# Supplementary material for: Enhanced production of heterologous proteins by a synthetic microbial community: Conditions and trade-offs
Source: PLoS Comput Biol. 2020 Apr 13;16(4):e1007795. doi: 10.1371/journal.pcbi.1007795 (PMC7179936; doi:10.1371/journal.pcbi.1007795)
Supplement: S1 Software — The code is accompanied by a description, instructions of usage and a summary of the implemented model. (ZIP) [file pcbi.1007795.s010.zip]

Archive with 67 entries (63 files):
- S1_Software/
- S1_Software/main.m
- S1_Software/script/
- S1_Software/script/basanData.m
- S1_Software/script/bettenbrockData.m
- S1_Software/script/bootstrap_fit.m
- S1_Software/script/create_heatmapparam.m
- S1_Software/script/data/
- S1_Software/script/data/DataxsA1.mat
- S1_Software/script/data/DataxsA2.mat
- S1_Software/script/data/DataxsA3.mat
- S1_Software/script/data/EnjalbertMu.mat
- S1_Software/script/data/EnjalbertRace.mat
- S1_Software/script/data/EnjalbertRgup.mat
- S1_Software/script/data/ExpBettenbrockAceOver.mat
- S1_Software/script/data/ExpBettenbrockGlcUp.mat
- S1_Software/script/data/ExpBettenbrockMu.mat
- S1_Software/script/data/expctedData1.mat
- S1_Software/script/data/expctedData2.mat
- S1_Software/script/data/expctedData3.mat
- S1_Software/script/data/ExpDataBasan1.mat
- S1_Software/script/data/ExpDataBasan2.mat
- S1_Software/script/data/expectedData1.mat
- S1_Software/script/data/expectedData2.mat
- S1_Software/script/data/expectedData3.mat
- S1_Software/script/data/ExpEnjalbertBatch.mat
- S1_Software/script/data/ExpEnjalbertBatchA.mat
- S1_Software/script/data/ExpEnjalbertBatchG.mat
- S1_Software/script/data/fittedParameters.mat
- S1_Software/script/data/fittedParametersBoot.mat
- S1_Software/script/data/observedData1.mat
- S1_Software/script/data/observedData2.mat
- S1_Software/script/data/observedData3.mat
- S1_Software/script/data/pH1data.mat
- S1_Software/script/data/pH2data.mat
- S1_Software/script/data/solSSPC.mat
- S1_Software/script/data/solSSPnoC.mat
- S1_Software/script/data/XBootNEW.mat
- S1_Software/script/DGinMap.m
- S1_Software/script/DGinPlots.m
- S1_Software/script/dynamics.m
- S1_Software/script/enjalbertData.m
- S1_Software/script/fedbatch.m
- S1_Software/script/findParameters.m
- S1_Software/script/findStableSolution.m
- S1_Software/script/fitParameters.m
- S1_Software/script/fitParameterspH.m
- S1_Software/script/FMINSEARCHBND/
- S1_Software/script/FMINSEARCHBND/fminsearchbnd.m
- S1_Software/script/FMINSEARCHBND/license.txt
- S1_Software/script/generateDGinMap.m
- S1_Software/script/minimizeChiSquare.m
- S1_Software/script/minimizeChiSquareBoot.m
- S1_Software/script/minimizeChiSquarepH.m
- S1_Software/script/Model.m
- S1_Software/script/parameters_values.m
- S1_Software/script/pHratio.m
- S1_Software/script/plot_DGinMap.m
- S1_Software/script/plot_dynamics.m
- S1_Software/script/plot_dynamicsFedBatch.m
- S1_Software/script/plot_parametersfit.m
- S1_Software/script/plot_SS.m
- S1_Software/script/plot_SSCnoC.m
- S1_Software/script/plot_SS_holdon.m
- S1_Software/script/rsq.m
- S1_Software/script/simulate_dynamics.m
- S1_Software/S1_Software_README.pdf
