# Supplementary material for: Enhanced production of heterologous proteins by a synthetic microbial community: Conditions and trade-offs
Source: PLoS Comput Biol. 2020 Apr 13;16(4):e1007795. doi: 10.1371/journal.pcbi.1007795 (PMC7179936; doi:10.1371/journal.pcbi.1007795)
Supplement: S1 Software — The code is accompanied by a description, instructions of usage and a summary of the implemented model. (ZIP) [file pcbi.1007795.s010.zip › S1_Software/script/create_heatmapparam.m]

%[heatmapparam] = create_heatmapparam()
%generates a structure containing the grid of points (D,Gin) used to
%simulate the system at steady state 
%
%Output:
%heatmapparam, structure with the grid (D,Gin)
%
%This file was written by Marco Mauri, 2019
%

function [heatmapparam] = create_heatmapparam()
heatmapparam = struct();

heatmapparam.Din = 0;
heatmapparam.Dfin = 0.802;
heatmapparam.Dstep = 0.02;

heatmapparam.Gin = 0;
heatmapparam.Gfin = 20.5;
heatmapparam.Gstep = 0.5;

end
