# Supplementary material for: Enhanced production of heterologous proteins by a synthetic microbial community: Conditions and trade-offs
Source: PLoS Comput Biol. 2020 Apr 13;16(4):e1007795. doi: 10.1371/journal.pcbi.1007795 (PMC7179936; doi:10.1371/journal.pcbi.1007795)
Supplement: S1 Software — The code is accompanied by a description, instructions of usage and a summary of the implemented model. (ZIP) [file pcbi.1007795.s010.zip › S1_Software/script/DGinPlots.m]

%plot_DGinMap
%plots the heat-map (D,Gin) coming form the steady-state analysis of 
%the consortium in chemostat operating in continuous mode
%
%Inputs:
%Ginplot, specify the value of Gin to use to produce the plots, if empty
%the maximum available is chosen
%parameters, the structure containing the paramters values
%
%Outputs:
%Plots of heat map D-Gin
%
%This file was written by Marco Mauri, 2019
%

function DGinPlots(Ginplot,parameters)
%% load rates and variables

load('script/data/solSSPC','solSSPC')
load('script/data/solSSPnoC','solSSPnoC')

%% select a specific Gin value

if isempty(Ginplot)
    Ginplot = solSSPC(end,2);
end

SS = solSSPC(solSSPC(:,2)==double(Ginplot),:);
SSnoC = solSSPnoC(solSSPnoC(:,2)==double(Ginplot),:);

%% plots

[~,axF1] = plot_SS(parameters,SS,15,19,'r_{up}^g [g/gDW/h]');
title(axF1,'Main Figure 5D')
hold(axF1, 'off');  
[~,axF2] = plot_SS(parameters,SS,16,20,'r_{over}^a [g/gDW/h]');
title(axF2,'Supporting Figure S6B')
hold(axF2, 'off');  
[~,axF3] = plot_SS(parameters,SS,17,21,'r_{up}^a [g/gDW/h]');
title(axF3,'Supporting Figure S6D')
hold(axF3, 'off');  

aplot = SS(:,1);
bplot = SS(:,5)+SS(:,6);
cplot = SS(:,7);
SSa = [aplot,bplot,cplot,0.*aplot,SS(:,5),0.*aplot,SS(:,7)];
[~,axF4] = plot_SS(parameters,SSa,2,3,'Btot [gDW/L]');
title(axF4,'Main Figure 5F')
hold(axF4, 'off');  

aplot = SS(:,1);
bplot = SS(:,1).*SS(:,6);
SSa = [aplot,bplot,0.*aplot,0.*aplot,SS(:,5),0.*aplot,SS(:,7)];
aplot = SSnoC(:,1);
bplot = SSnoC(:,1).*SSnoC(:,6);
SSnoCa = [aplot,bplot,0.*aplot,0.*aplot,SSnoC(:,5),0.*aplot,SSnoC(:,7)];
[~,axF5] = plot_SSCnoC(parameters,SSa,2,SSnoCa,2,'DH [gDW/L/h]');
title(axF5,'Main Figure 6B')
hold(axF5, 'off');  

aplot = SS(:,1);
bplot = SS(:,6)./Ginplot;
SSa = [aplot,bplot,0.*aplot,0.*aplot,SS(:,5),0.*aplot,SS(:,7)];
aplot = SSnoC(:,1);
bplot = SSnoC(:,6)./Ginplot;
SSnoCa = [aplot,bplot,0.*aplot,0.*aplot,SSnoC(:,5),0.*aplot,SSnoC(:,7)];
[~,axF6] = plot_SSCnoC(parameters,SSa,2,SSnoCa,2,'H/G_{in} [gDW/g]');
title(axF6,'Main Figure 6C')
hold(axF6, 'off'); 

end
