# Supplementary material for: Enhanced production of heterologous proteins by a synthetic microbial community: Conditions and trade-offs
Source: PLoS Comput Biol. 2020 Apr 13;16(4):e1007795. doi: 10.1371/journal.pcbi.1007795 (PMC7179936; doi:10.1371/journal.pcbi.1007795)
Supplement: S1 Software — The code is accompanied by a description, instructions of usage and a summary of the implemented model. (ZIP) [file pcbi.1007795.s010.zip › S1_Software/script/minimizeChiSquarepH.m]

%[chisquaretot] = minimizeChiSquarepH(X,blackboxmodel,dataset)
%computes the total chi-square of the three sets of data used to obtain (Ta,n,Tg,m)
%
%Inputs:
%X is Ta
%blackboxmodel, is the model name
%dataset, is the dataset number
%
%Output:
%chisquaretot, chi-square
%
%This file was written by Marco Mauri, 2019
%

function [chisquaretot] = minimizeChiSquarepH(X,blackboxmodel,dataset)

plotfigure = 0;
[chisquare] = fitParameterspH(X,blackboxmodel,dataset,plotfigure);

chisquaretot = chisquare.^2;

end
