# Supplementary material for: Enhanced production of heterologous proteins by a synthetic microbial community: Conditions and trade-offs
Source: PLoS Comput Biol. 2020 Apr 13;16(4):e1007795. doi: 10.1371/journal.pcbi.1007795 (PMC7179936; doi:10.1371/journal.pcbi.1007795)
Supplement: S1 Software — The code is accompanied by a description, instructions of usage and a summary of the implemented model. (ZIP) [file pcbi.1007795.s010.zip › S1_Software/script/plot_DGinMap.m]

%plot_DGinMap
%plots the heat-map (D,Gin) coming form the steady-state analysis of 
%the consortium in chemostat operating in continuous mode
%
%Outputs:
%Plots of heat map D-Gin
%
%This file was written by Marco Mauri, 2019
%

function plot_DGinMap

load('script/data/solSSPC','solSSPC')

rd = 'r';
gr = [0.4660 0.6740 0.1880];
og = [255/255 153/255 51/255];

D=1;
Gin=2;
Bp=5;
Bc=7;
sizep=85;
markertype='o';

%% figure regarding the coexistence of P and C

fig = figure;
axF = axes('Parent', fig);
hold(axF, 'on');  
hms=msgbox('Please wait. Plotting in progress...');

k=0;
for i=1:size(solSSPC,1)
    if solSSPC(i,Bp)==0 && solSSPC(i,Bc)==0 
        scatter(solSSPC(i,D),solSSPC(i,Gin),sizep,'k','filled',markertype)
    
    elseif solSSPC(i,Bp)~=0 && solSSPC(i,Bc)~=0 
        scatter(solSSPC(i,D),solSSPC(i,Gin),sizep,rd,'filled',markertype)
    
    elseif solSSPC(i,Bp)==0 && solSSPC(i,Bc)~=0
        scatter(solSSPC(i,D),solSSPC(i,Gin),sizep,og,'filled',markertype)
    
    elseif solSSPC(i,Bp)~=0 && solSSPC(i,Bc)==0
        scatter(solSSPC(i,D),solSSPC(i,Gin),sizep,gr,'filled',markertype)
    end
    k=k+1;
    hold(axF, 'on'); 
end

xlabel('D [1/h]')
ylabel('Gin [g/L]')
grid on
box on
set(gca,'FontSize',15)
pbaspect([1 1 1])
axis tight
title(axF,'Main Figure 5B')
drawnow
hold(axF, 'off'); 

if isvalid(hms); delete(hms); end

%% figure heat map

xt = solSSPC(:,1); %D
yt = solSSPC(:,2); %Gin
zt = solSSPC(:,1).*solSSPC(:,6); %D*H

xsize = size(find(xt==xt(end)),1);
ysize = size(xt,1)/xsize;

x = reshape(xt, xsize, ysize);
y = reshape(yt, xsize, ysize);
z = reshape(zt, xsize, ysize);

fig2 = figure;
axF2 = axes('Parent', fig2);
hold(axF2, 'on'); 
hms=msgbox('Please wait. Plotting in progress...');
tri = delaunay(x,y); % Little triangles
trisurf(tri, x, y, z); % Plot it with TRISURF
% Clean it up
shading interp
colorbar EastOutside
axis tight
colormap gray
view(2)
xlabel('D [1/h]')
ylabel('G_{in}^* [g/L]')
zlabel('D \cdot H [g/(L h)]')
set(gca,'FontSize',15)
title('Main Figure 6A')
drawnow
hold(axF2, 'off'); 

if isvalid(hms); delete(hms); end


end
