# Supplementary material for: Enhanced production of heterologous proteins by a synthetic microbial community: Conditions and trade-offs
Source: PLoS Comput Biol. 2020 Apr 13;16(4):e1007795. doi: 10.1371/journal.pcbi.1007795 (PMC7179936; doi:10.1371/journal.pcbi.1007795)
Supplement: S1 Software — The code is accompanied by a description, instructions of usage and a summary of the implemented model. (ZIP) [file pcbi.1007795.s010.zip › S1_Software/script/plot_dynamics.m]

%plot_dynamics(T,X,r,parameters)
%plots the time evolution of the variable (G,A,Bp,H,Bc)
%
%Inputs:
%T time vector
%X = [G,A,BP,H,BC]; variables vector
%r = [muP,muC,rgupP,raoverP,raupP,rH,rgupC,raoverC,raupC,kdeg]; internal rate vector
%parameters, the structure containing the paramters values
%
%Outputs:
%plots time evolutions of (G,A,Bp,H,Bc) and of the growth rates
%
%This file was written by Marco Mauri, 2019
%

function plot_dynamics(T,X,r,parameters)

figure('units','normalized','outerposition',[0 0 1 2/3])
subplot(1,2,1);
plot(T,X(:,1),'-','LineWidth',parameters.plot(2),'Color',parameters.colors(1,:));
hold on
plot(T,X(:,2),'-','LineWidth',parameters.plot(2),'Color',parameters.colors(2,:));
plot(T,X(:,3),'-','LineWidth',parameters.plot(2),'Color',parameters.colors(3,:));
plot(T,X(:,4),'-','LineWidth',parameters.plot(2),'Color',parameters.colors(7,:));
plot(T,X(:,5),'-','LineWidth',parameters.plot(2),'Color',parameters.colors(4,:));
plot(T,X(:,3)+X(:,4),'--','LineWidth',parameters.plot(2),'Color',parameters.colors(3,:));
legend('G','A','BP','H','BC','BP+H')
xlabel('Time [h]')
ylabel('[g/L]')
set(gca,'FontSize',parameters.plot(1))
grid on
box on
axis tight
title('Figure not in paper - Dynamics')
drawnow

subplot(1,2,2);
plot(T,r(:,1),'-','LineWidth',parameters.plot(2),'Color',parameters.colors(3,:));
hold on
plot(T,r(:,2),'-','LineWidth',parameters.plot(2),'Color',parameters.colors(8,:));
legend('Growth Rate P','Growth Rate C')
xlabel('Time [h]')
ylabel('Growth Rate [1/h]')
set(gca,'FontSize',parameters.plot(1))
grid on
box on
axis tight
title('Figure not in paper - Growth rate')
drawnow

end
