# Supplementary material for: Enhanced production of heterologous proteins by a synthetic microbial community: Conditions and trade-offs
Source: PLoS Comput Biol. 2020 Apr 13;16(4):e1007795. doi: 10.1371/journal.pcbi.1007795 (PMC7179936; doi:10.1371/journal.pcbi.1007795)
Supplement: S1 Software — The code is accompanied by a description, instructions of usage and a summary of the implemented model. (ZIP) [file pcbi.1007795.s010.zip › S1_Software/script/plot_SSCnoC.m]

%plot_SSnoC
%plots some steady-state results as a function of D for the case with and without cleaner
%
%Inputs:
%parameters, the structure containing the paramters values
%SS is the array containing the variables and the rates at steady state for a specific Gin in the presence of cleaner and producer
%j is the entry of the vector SS to plot on the y axis, D is on the x axis
%SSnoC is the array containing the variables and the rates at steady state for a specific Gin in the absence of cleaner
%k is the entry of the vector SSnoC to plot on the y axis, D is on the x axis
%ylab is the string of the y-label
%
%Outputs:
%Plots j and k entries of the steady-state solutions SS and SSnoC, respectively, as function of D 
%fig and axF are the handler of the figure and the current axis
%
%This file was written by Marco Mauri, 2019
%

function [fig,axF] = plot_SSCnoC(parameters,SS,j,SSnoC,k,ylab)

fig = figure;
axF = axes('Parent', fig);
hold(axF, 'on');  

pBP = 5;
pBC = 7;
cl = parameters.colors(2,:);
cl2 = parameters.colors(3,:);

psz = parameters.plot(3);
lw = parameters.plot(4);
asz = 100;

xplot = SS(:,1);
yplot = SS(:,j);

intx = min(xplot(:,1)):(max(xplot(:,1))-min(xplot(:,1)))/(50*size(xplot,1)):max(xplot(:,1));
inty = interp1(xplot,yplot,intx,'pchip');
plot(intx,inty,'--','Color',cl,'LineWidth',lw)
%drawnow

for i=1:size(SS,1)
    if SS(i,pBP)~=0 && SS(i,pBC)~=0
        s=scatter(SS(i,1),SS(i,j),psz,cl,'filled','o');
        s.MarkerEdgeColor = cl;
    elseif SS(i,pBP)~=0 && SS(i,pBC)==0
        s=scatter(SS(i,1),SS(i,j),psz,cl2,'filled','o');
        s.MarkerEdgeColor = cl2;
    elseif SS(i,pBP)==0 && SS(i,pBC)~=0
        s=scatter(SS(i,1),SS(i,j),psz,cl2,'filled','o');
        s.MarkerEdgeColor = cl2;
    elseif SS(i,pBP)==0 && SS(i,pBC)==0
        s=scatter(SS(i,1),SS(i,j),psz,'k','filled','o');
        s.MarkerEdgeColor = 'k';
    end
    %drawnow
end

xplot = SSnoC(:,1);
yplot = SSnoC(:,k);

intx = min(xplot(:,1)):(max(xplot(:,1))-min(xplot(:,1)))/(50*size(xplot,1)):max(xplot(:,1));
inty = interp1(xplot,yplot,intx,'pchip');
plot(intx,inty,'-','Color',cl2,'LineWidth',lw)
%drawnow

for i=1:size(SSnoC,1)
    if SSnoC(i,pBP)~=0 && SSnoC(i,pBC)~=0
        s=scatter(SSnoC(i,1),SSnoC(i,k),asz,cl2,'o');
        s.MarkerEdgeColor = cl2;
    elseif SSnoC(i,pBP)~=0 && SSnoC(i,pBC)==0
        s=scatter(SSnoC(i,1),SSnoC(i,k),asz,cl2,'o');
        s.MarkerEdgeColor = cl2;
    elseif SSnoC(i,pBP)==0 && SSnoC(i,pBC)~=0
        s=scatter(SSnoC(i,1),SSnoC(i,k),asz,cl2,'o');
        s.MarkerEdgeColor = cl2;
    elseif SSnoC(i,pBP)==0 && SSnoC(i,pBC)==0
        s=scatter(SSnoC(i,1),SSnoC(i,k),asz,'k','o');
        s.MarkerEdgeColor = 'k';
    end
    %drawnow
end

clear SSblack
for i=1:size(SS,1)
    if  SS(i,pBP)==0 && SS(i,pBC)==0
        SSblack(i,:) = [SS(i,1),SS(i,j)];
        s=scatter(SS(i,1),SS(i,j),psz,'k','filled','o');
        s.MarkerEdgeColor = 'k';
    end
end

SSblackU = unique(SSblack,'row');
SSblackU = SSblackU(any(SSblackU,2),:);
intx = min(SSblackU(:,1)):(max(SSblackU(:,1))-min(SSblackU(:,1)))/(50*size(SSblackU,1)):max(SSblackU(:,1));
inty = interp1(SSblackU(:,1),SSblackU(:,2),intx,'pchip');
plot(intx,inty,'-','Color','k','LineWidth',lw)
%drawnow

xlabel('D [1/h]')
ylabel(ylab)
grid on
box on
set(gca,'FontSize',parameters.plot(1))
drawnow

end
