# Supplementary material for: Enhanced production of heterologous proteins by a synthetic microbial community: Conditions and trade-offs
Source: PLoS Comput Biol. 2020 Apr 13;16(4):e1007795. doi: 10.1371/journal.pcbi.1007795 (PMC7179936; doi:10.1371/journal.pcbi.1007795)
Supplement: S1 Software — The code is accompanied by a description, instructions of usage and a summary of the implemented model. (ZIP) [file pcbi.1007795.s010.zip › S1_Software/script/rsq.m]

%[rs]=rsq(ydata,yestimation)
%computes the rsquare
%
%Input:
%ydata, observed data
%yestimation, estimated data
%
%Output:
%rs, coefficient of determination
%
%This file was written by Marco Mauri, 2019
%

function [rs]=rsq(ydata,yestimation)
    Sres=sum( (ydata-yestimation).^2 );
    Stot=sum( (ydata-mean(ydata)).^2 );
    rs=1-Sres/Stot;     
end
